# Supplementary material for: Hyperactive gp130/STAT3‐driven gastric tumourigenesis promotes submucosal tertiary lymphoid structure development
Source: PubMed Central journal article supplement (PMC5969244; doi:10.1002/ijc.31298), 2018-02-19
Supplement: IJC-143-167-s001.pdf [file IJC-143-167-s001.pdf]

**Supplementary Material.** Hill et al, Hyperactive gp130/STAT3-driven gastric tumourigenesis promotes submucosal tertiary lymphoid structure development

**Table S1.** Primer sequences for SYBR green-based qPCR and PCR amplification of the *H.felis flaB* gene.

| Name                         | Sequence                          |
|------------------------------|-----------------------------------|
| <i>Cxcl13</i> forward        | 5'-TGCCCCAAAAGTGAAGTTGTGATCT-3'   |
| <i>Cxcl13</i> reverse        | 5'-ACTCACTGGAGCTTGGGGAGTTGA-3'    |
| <i>Ccl19</i> forward         | 5'-GCGCACACAGTCTCTCAGGCTC-3'      |
| <i>Ccl19</i> reverse         | 5'-AGTTGGGGCTGGGAAGGTCCA-3'       |
| <i>Ccl21</i> forward         | 5'-CCCCTGGACCCAAGGCAGTGA-3'       |
| <i>Ccl21</i> reverse         | 5'-TTGCCGGGATGGGACAGCCT-3'        |
| <i>Cxcl12</i> forward        | 5'-GCGCTCTGCATCAGTGACGGTAA-3'     |
| <i>Cxcl12</i> reverse        | 5'-GCTTGACGTTGGCTCTGGCGA-3'       |
| <i>Bcl6</i> forward          | 5'-CCTGCAACTGGAAGAAGTATAAG-3'     |
| <i>Bcl6</i> reverse          | 5'-AGTATGGAGGCACATCTCTGTAT-3'     |
| <i>Il21</i> forward          | 5'-CCCCAAGGGCCAGATCGCCT-3'        |
| <i>Il21</i> reverse          | 5'-TGCATGCTCACAGTGCCCCTTT-3'      |
| <i>Il27</i> forward          | 5'-CGATTGCCAGGAGTGAACCT-3'        |
| <i>Il27</i> reverse          | 5'-CAGAGTCAGAGAGGTGATGCC-3'       |
| <i>Il17a</i> forward         | 5'-ACCGCAATGAAGACCCTGAT-3'        |
| <i>Il17a</i> reverse         | 5'-TCCCTCCGCATTGACACA-3'          |
| <i>18S rRNA</i> forward      | 5'-GTAACCCGTTGAACCCCAT-3'         |
| <i>18S rRNA</i> reverse      | 5'-CCATCCAATCGGTAGTAGCG-3'        |
| <i>H. felis flaB</i> forward | 5'-TTCGATTGGTCCTACAGGCTCAGA-3'    |
| <i>H. felis flaB</i> reverse | 5'-TTCTTGTTGATGACATTGACCAACGCA-3' |

**Table S2.** Clinicopathological features and demographics of gastric cancer patient cohorts from The Cancer Genome Atlas (TCGA) used for expression profiling of ELS.

|                                               | <b>TCGA cohort<br/>(Intestinal-type)</b> | <b>TCGA cohort<br/>(Normal tissue)</b> |
|-----------------------------------------------|------------------------------------------|----------------------------------------|
| <b>Mean age</b>                               |                                          |                                        |
| Years (range)                                 | 65.9 (30-90)                             | 67 (46-88)                             |
| <b>Gender<sup>a</sup></b>                     |                                          |                                        |
| Male                                          | 116 (66)                                 | 23 (66)                                |
| Female                                        | 60 (34)                                  | 12 (34)                                |
| Unknown                                       | 0 (0)                                    | 0 (0)                                  |
| <b>Lauren class<sup>a</sup></b>               |                                          |                                        |
| Intestinal-type                               | 176 (100)                                | 13 (37)                                |
| Diffuse                                       | 0 (0)                                    | 6 (17)                                 |
| Unknown                                       | 0 (0)                                    | 16 (46)                                |
| <b><i>H. pylori</i> infection<sup>a</sup></b> |                                          |                                        |
| Positive                                      | 12 (7)                                   | 1 (3)                                  |
| Negative                                      | 101 (57)                                 | 7 (20)                                 |
| Unknown                                       | 63 (36)                                  | 27 (77)                                |
| <b>Tumour grade<sup>a</sup></b>               |                                          |                                        |
| 1                                             | 6 (3)                                    | 0 (0)                                  |
| 2                                             | 92 (52)                                  | 14 (40)                                |
| 3                                             | 75 (43)                                  | 21 (60)                                |
| 4                                             | 0 (0)                                    | 0 (0)                                  |
| Unknown <sup>b</sup>                          | 3 (2)                                    | 0 (0)                                  |

<sup>a</sup>Values in parentheses are %.

<sup>b</sup>No information available.

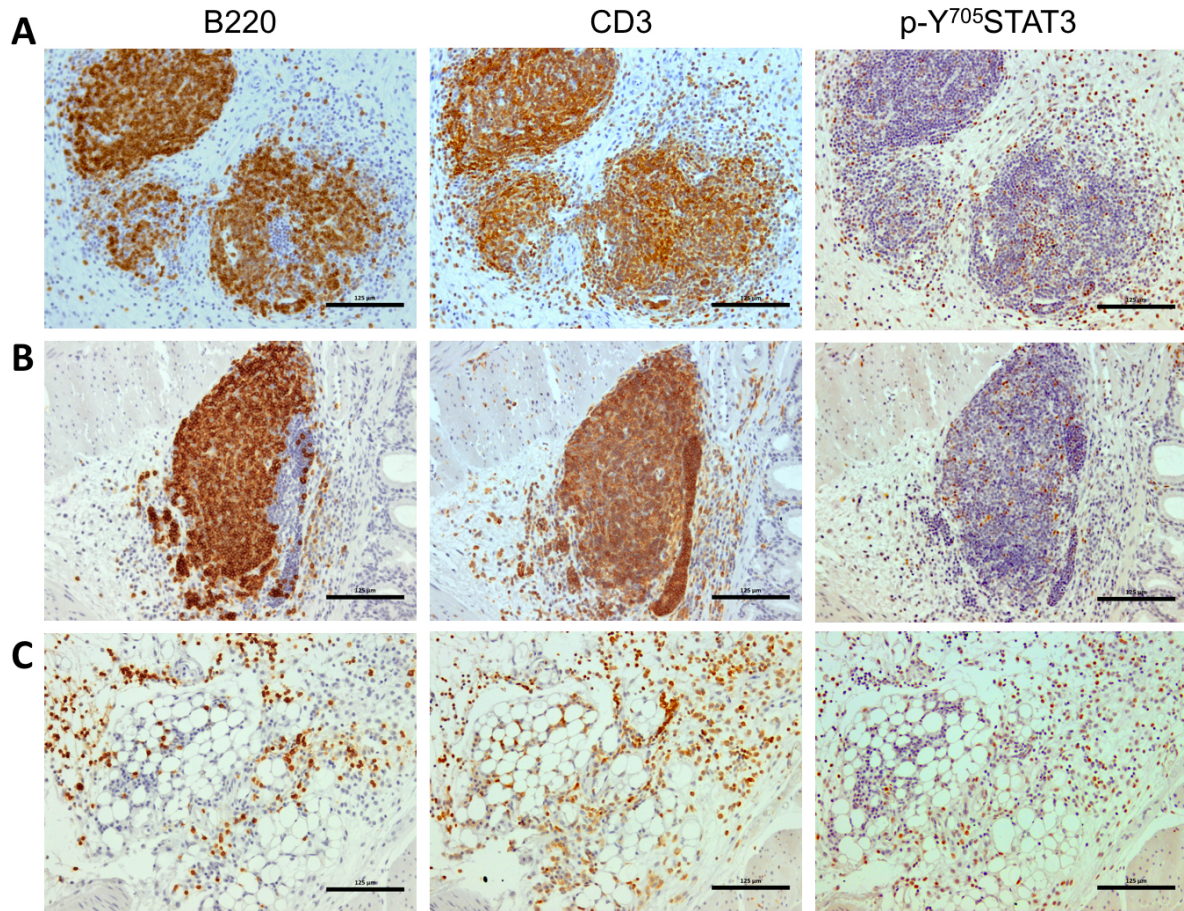

**Figure S1. Immunohistochemistry for p-Y<sup>705</sup>STAT3 at submucosal tumour-associated TLS in *gp130<sup>F/F</sup>* mice.** Representative immunohistochemistry of serial gastric antrum sections for B220, CD3 and p-Y<sup>705</sup>STAT3 in 3-month-old (A) and 6-month-old (B-C) *gp130<sup>F/F</sup>* mice. Cells positive for p-Y<sup>705</sup>STAT3 can be seen in lymphoid aggregates (A-B) and in diffuse areas of inflammation (C). Scale bar: 125 µm.

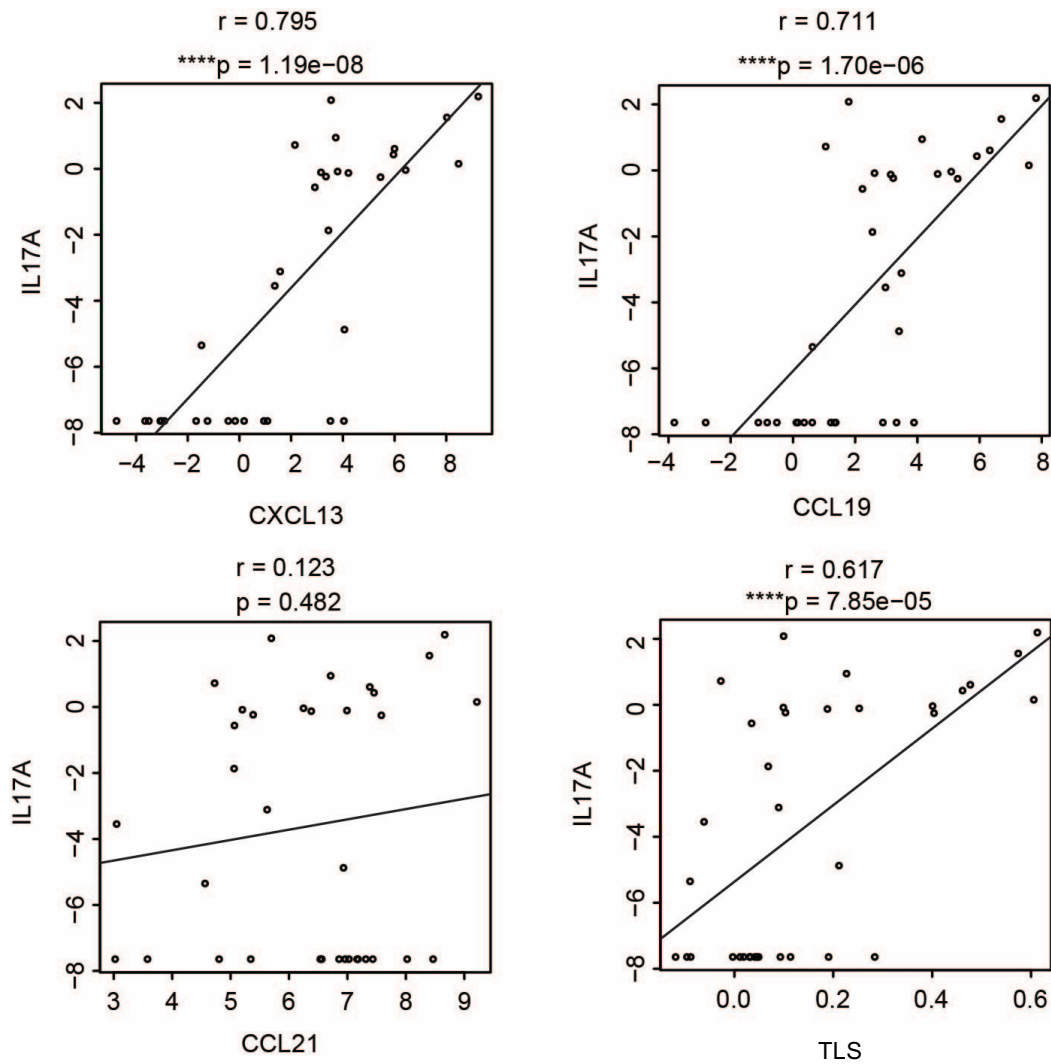

**Figure S2. Correlations between *IL17A* and lymphoid chemokine expression in human gastric cancer (GC).** Analysis by Spearman correlation coefficients of the gene expression between *IL17A* and *CXCL13*, *CCL19*, *CCL21* and a 3-gene TLS signature in 35 matched non-tumour (NT) tissues from The Cancer Genome Atlas GC cohort. The 3-gene TLS signature comprising *CXCL13*, *CCL19* and *CCL21* was identified in the *gp130<sup>F/F</sup>* GC mouse model associated with submucosal ELS.

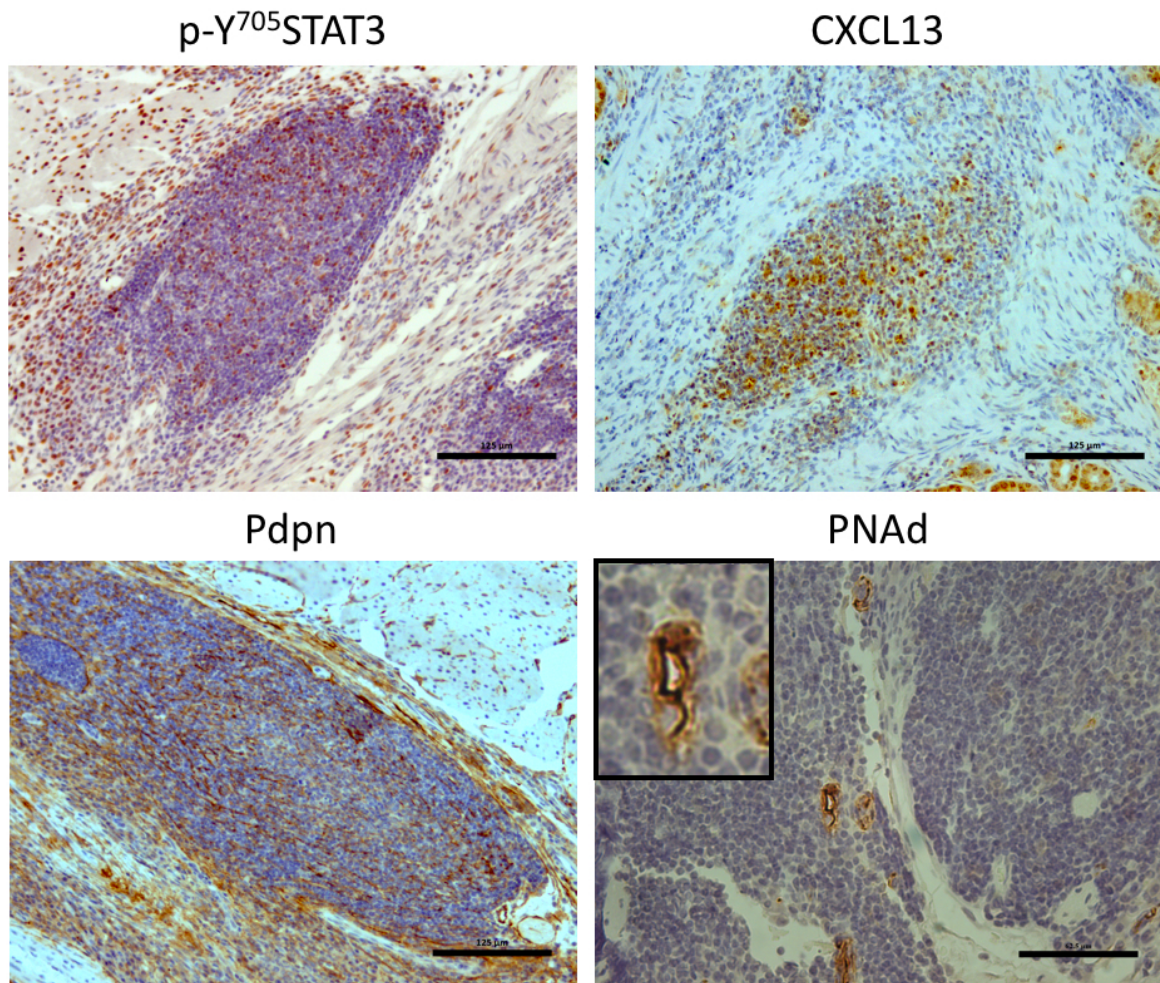

**Figure S3. Characterisation of tumour-associated TLS in *gp130<sup>F/F</sup>:Il17a<sup>-/-</sup>* mice.** Representative IHC of p-Y<sup>705</sup>STAT3, CXCL13, Pdpn and PNAd<sup>+</sup> HEV at submucosal TLS in 6-month-old *gp130<sup>F/F</sup>:Il17a<sup>-/-</sup>* mice. Scale bars: 125 μm.

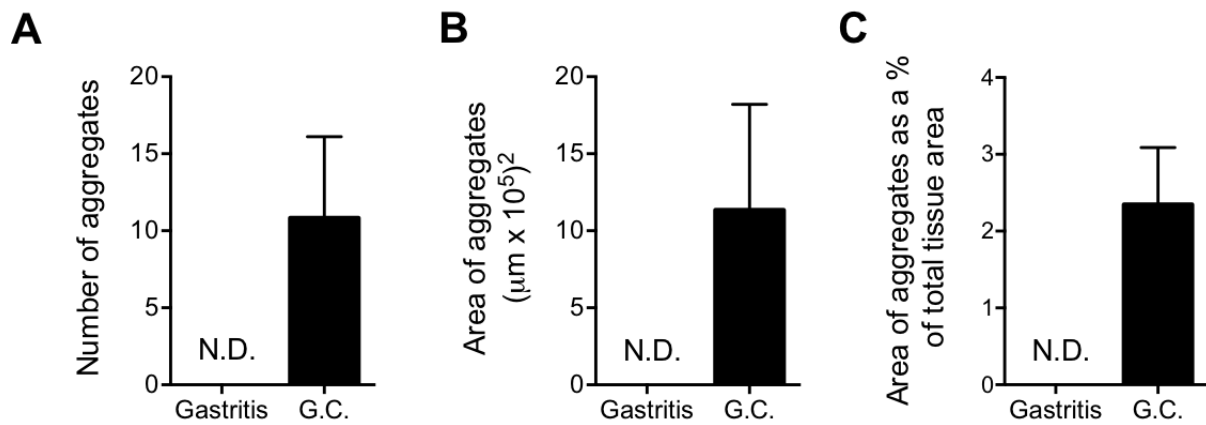

**Figure S4. Quantification of TLSs in biopsy samples from patients with intestinal-type gastric cancer (GC).** The number of TLSs (A), the total area of TLSs (B) and the area of TLSs as a percentage of total tissue area (C) was quantified in human GC tissue biopsies following immunohistochemical detection of CD20<sup>+</sup> cellular aggregates (n = 6). TLSs were absent in biopsies from patients with gastritis and intestinal metaplasia (n = 10). Graphs represent mean  $\pm$ SEM. (N.D. None detected).

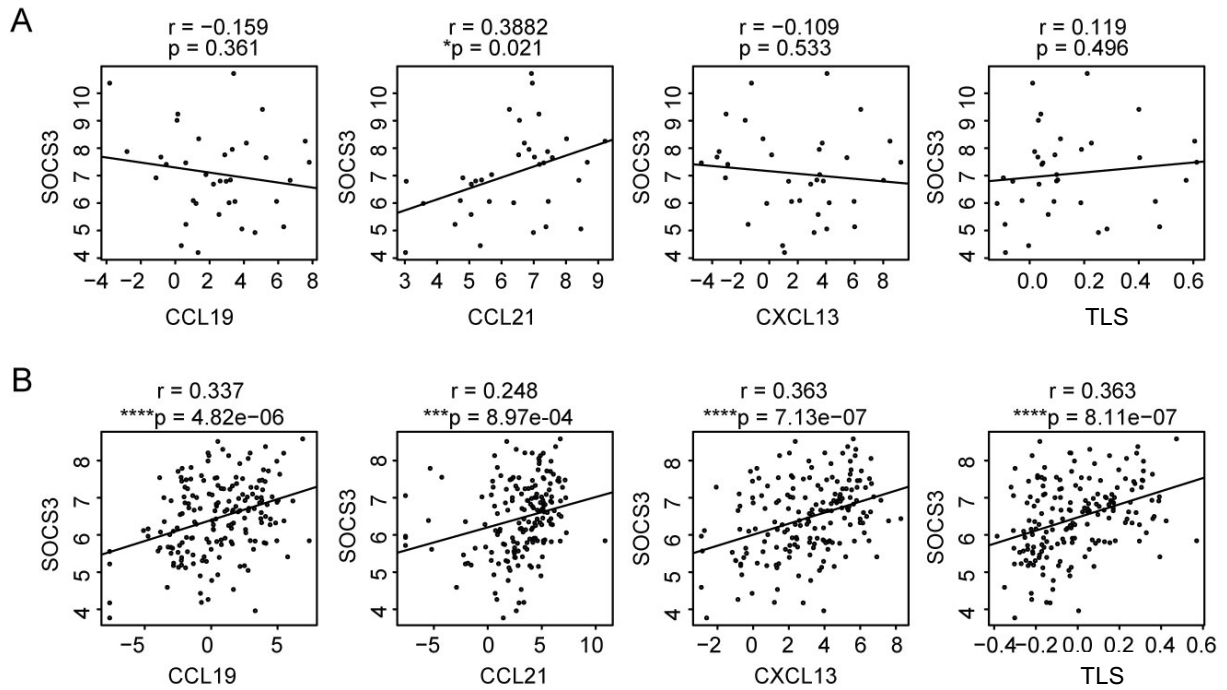

**Figure S5. Correlations between the STAT3 target gene *SOCS3* and TLS related genes in human gastric cancer (GC).** Analysis by Spearman correlation coefficients of the gene expression between *SOCS3* and *CCL19*, *CCL21*, *CXCL13* and the 3-gene TLS signature in 35 matched non-tumour tissues (**A**) and 176 intestinal-type tumour tissues (**B**) from The Cancer Genome Atlas GC cohort.

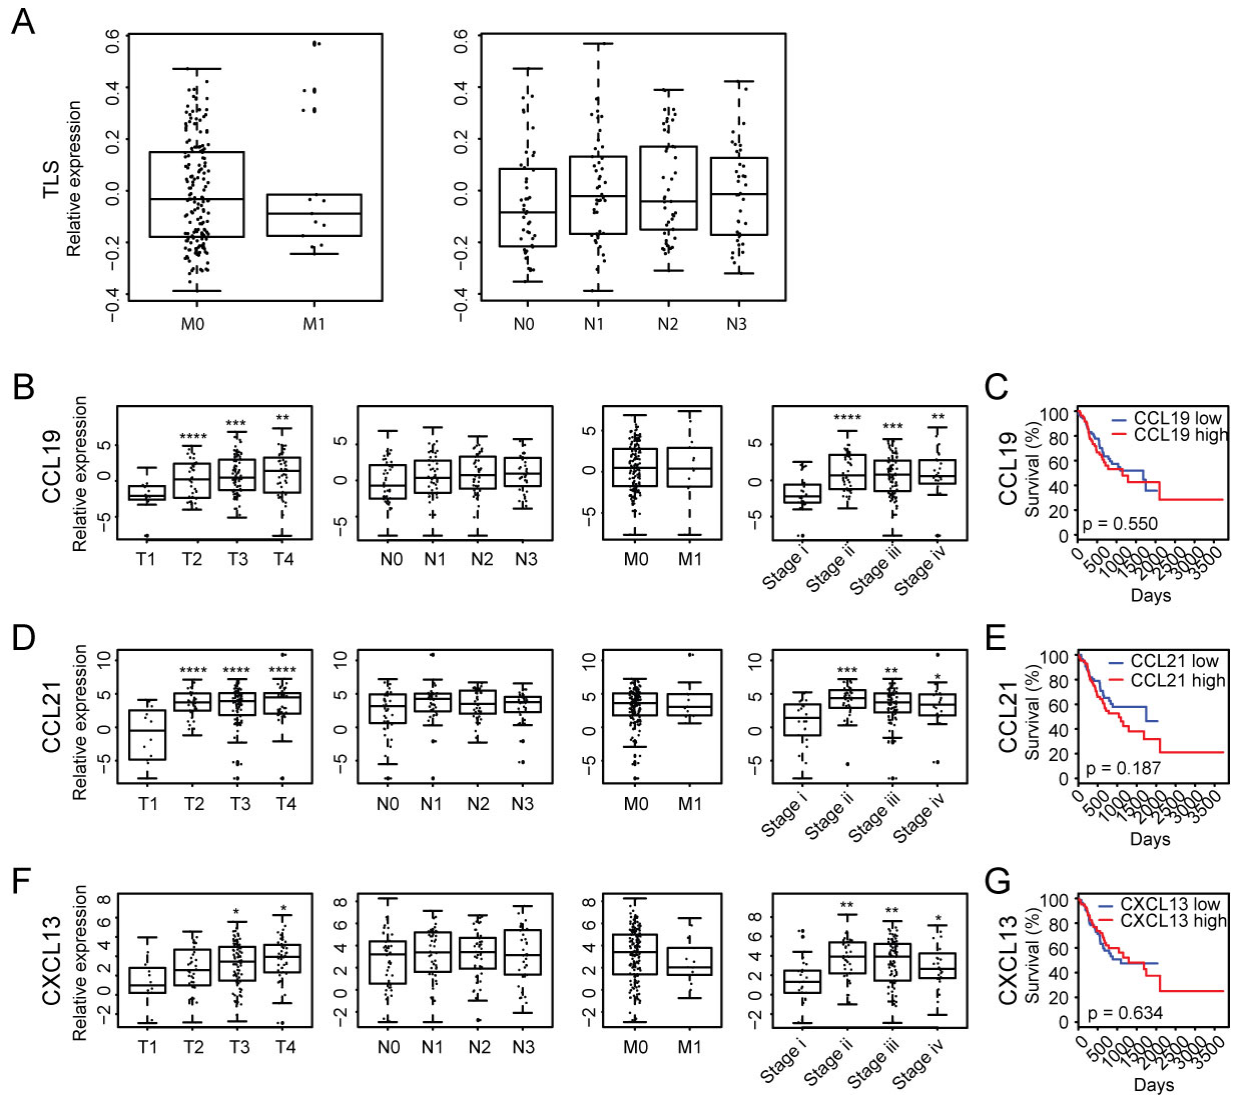

**Figure S6. The association of TNM stage with the expression of a TLS gene signature and individual lymphoid chemokines in intestinal-type gastric cancer (GC).** (A) Box and whisker plots showing the relative expression (logRPKM) of the 3-gene TLS signature at the indicated N and M stage of disease in The Cancer Genome Atlas (TCGA) cohorts with intestinal-type GC. (B, D, F) Box and whisker plots showing the relative expression of individual TLS genes (*CCL19*, *CCL21* and *CXCL13*) at the indicated TNM stage in TCGA cohorts with intestinal-type GC. (C, E, G) Kaplan-Meier overall survival curves for individual TLS genes with low and high expression in TCGA intestinal-type GC patients. Log rank with p-values were calculated. In B, D, F, data are presented as the mean  $\pm$  SEM. \* $p < 0.05$ , \*\* $p < 0.01$ ,



\*\*\* $p < 0.001$ , \*\*\*\* $p < 0.0001$ . Detailed clinical information for TCGA patients is listed in Supplementary Table S2.

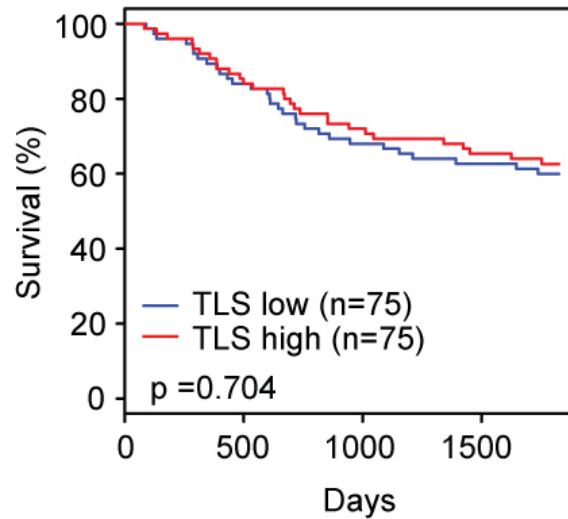

**Figure S7. Evaluation of a TLS gene signature comprising *CXCL13*, *CCL19* and *CCL21* in an independent data set of intestinal-type gastric cancer (GC) patients from the Asian Cancer Research Group (ACRG) cohort.** Patients were stratified into low or high expression of a TLS gene signature comprising *CXCL13*, *CCL19* and *CCL21* ('TLS high' or 'TLS low') by the median of RPKM in 150 intestinal-type GC patients in the ACRG cohort with follow-up information. Kaplan-Meier overall survival curves for subgroups with 'TLS high' and 'TLS low' are presented. Log rank with p-values were calculated.
